# Supplementary material for: Matrix Analysis of the Digital Divide in eHealth Services Using Awareness, Want, and Adoption Gap
Source: PubMed Central journal article supplement (PMC3374548; doi:10.2196/jmir.1670), 2012-02-13
Supplement: jmir_v14i1e11_app2.pdf [file jmir_v14i1e11_app2.pdf]

**Multimedia Appendix 2**

**Table 5. Results of chi-squared independent tests for the digital divide in DMS**

| Demographics            |             | Digital Medical Service (DMS) |             |                |
|-------------------------|-------------|-------------------------------|-------------|----------------|
|                         |             | Awareness<br>H1               | Want<br>H2  | Adoption<br>H3 |
| Gender                  | Chi-squared | .41                           | .02         | 3.99           |
|                         | df          | 1                             | 1           | 1              |
|                         | P-value     | <b>.524</b>                   | <b>.889</b> | <b>.046*</b>   |
| Age Group               | Chi-squared | 182.88                        | 113.05      | 58.51          |
|                         | df          | 5                             | 5           | 5              |
|                         | P-value     | <.001*                        | <.001*      | <.001*         |
| Educational Level       | Chi-squared | 222.63                        | 169.38      | 140.66         |
|                         | df          | 5                             | 5           | 5              |
|                         | P-value     | <.001*                        | <.001*      | <.001*         |
| Marital Status          | Chi-squared | 195.65                        | 113.76      | 60.03          |
|                         | df          | 2                             | 2           | 2              |
|                         | P-value     | <.001*                        | <.001*      | <.001*         |
| Living Area             | Chi-squared | 62.20                         | 37.39       | 124.60         |
|                         | df          | 5                             | 5           | 7              |
|                         | P-value     | <.001*                        | <.001*      | <.001*         |
| Personal monthly Income | Chi-squared | 198.37                        | 119.17      | 117.89         |
|                         | df          | 7                             | 7           | 8              |
|                         | P-value     | <.001*                        | <.001*      | <.001*         |
| Family Monthly Income   | Chi-squared | 135.86                        | 133.92      | 23.78          |
|                         | df          | 8                             | 8           | 5              |
|                         | P-value     | <.001*                        | <.001*      | <.001*         |
| Computer owned          | Chi-squared | 204.77                        | 184.64      | 60.88          |
|                         | df          | 1                             | 1           | 1              |
|                         | P-value     | <.001*                        | <.001*      | <.001*         |
| Internet Access         | Chi-squared | 125.25                        | 177.90      | 149.83         |
|                         | df          | 1                             | 1           | 1              |
|                         | P-value     | <.001*                        | <.001*      | <.001*         |

Data resource: This research

P-value means the p value of the Fisher's exact test or of Pearson Chi-squared test.

H1, H2, H3 are alternative hypotheses. H1: There exists an awareness divide in e-health services across certain demographic variables, computer ownership, and internet access. H2: There exists a want divide in e-health services across certain demographic variables, computer ownership, and internet access. H3: There exists an adoption divide in e-health services across certain demographic variables, computer ownership, and internet access.

**Table 6. Results of chi-squared independent tests for the digital divide in DHCS**

| Demographics                  |             | Digital Home Care Service (DHCS) |             |                |
|-------------------------------|-------------|----------------------------------|-------------|----------------|
|                               |             | Awareness<br>H1                  | Want<br>H2  | Adoption<br>H3 |
| Gender                        | Chi-squared | 5.99                             | .01         | 2.74           |
|                               | df          | 1                                | 1           | 1              |
|                               | P-value     | .014*                            | <b>.920</b> | <b>.098</b>    |
| Age Group                     | Chi-squared | 48.03                            | 69.92       | 5.19           |
|                               | df          | 5                                | 5           | 5              |
|                               | P-value     | <.001*                           | <.001*      | <b>.394</b>    |
| Educational<br>Level          | Chi-squared | 91.67                            | 93.92       | 7.84           |
|                               | df          | 5                                | 5           | 5              |
|                               | P-value     | <.001*                           | <.001*      | <b>.165</b>    |
| Marital<br>Status             | Chi-squared | 37.50                            | 70.88       | 5.65           |
|                               | df          | 2                                | 2           | 2              |
|                               | P-value     | <.001*                           | <.001*      | <b>.059</b>    |
| Living Area                   | Chi-squared | 17.94                            | 31.55       | 6.51           |
|                               | df          | 5                                | 5           | 5              |
|                               | P-value     | .003*                            | <.001*      | <b>.259</b>    |
| Personal<br>monthly<br>Income | Chi-squared | 72.11                            | 67.13       | 14.17          |
|                               | df          | 7                                | 7           | 7              |
|                               | P-value     | <.001*                           | <.001*      | <b>.048*</b>   |
| Family<br>Monthly<br>Income   | Chi-squared | 64.08                            | 68.00       | 21.08          |
|                               | df          | 8                                | 8           | 8              |
|                               | P-value     | <.001*                           | <.001*      | <b>.007*</b>   |
| Computer<br>owned             | Chi-squared | 47.46                            | 133.49      | 5.17           |
|                               | df          | 1                                | 1           | 1              |
|                               | P-value     | <.001*                           | <.001*      | <b>.023*</b>   |
| Internet<br>Access            | Chi-squared | 57.75                            | 98.20       | 13.19          |
|                               | df          | 1                                | 1           | 1              |
|                               | P-value     | <.001*                           | <.001*      | <.001*         |

Data resource: This research

P-value means the p value of the Fisher's exact test or of Pearson Chi-squared test.

H1, H2, H3 are alternative hypotheses. H1: There exists an awareness divide in e-health services across certain demographic variables, computer ownership, and internet access. H2: There exists a want divide in e-health services across certain demographic variables, computer ownership, and internet access. H3: There exists an adoption divide in e-health services across certain demographic variables, computer ownership, and internet access.

**Table 7. P-values of the paired proportion tests for H4, H5, and H6 in DMS**

| Demographics            |    |                       | Digital Medical Service (DMS) |         |             |
|-------------------------|----|-----------------------|-------------------------------|---------|-------------|
|                         |    |                       | H4                            | H5      | H6          |
| Variables               | ID | Items                 | P-value                       | P-value | P-value     |
| Total                   | T  |                       | <.001                         | <.001   | <.001       |
| Gender                  | G1 | Male                  | <.001                         | <.001   | <.001       |
|                         | G2 | Female                | <.001                         | <.001   | <.001       |
| Age Level               | A1 | 15–24                 | <.001                         | <.001   | <.001       |
|                         | A2 | 25–34                 | <.001                         | <.001   | <.001       |
|                         | A3 | 35–44                 | <.001                         | <.001   | <.001       |
|                         | A4 | 45–54                 | <.001                         | <.001   | <.001       |
|                         | A5 | 55–64                 | <.001                         | <.001   | <.001       |
|                         | A6 | over 65               | <.001                         | <.001   | <.001       |
| Educational Level       | E1 | Below primary school  | <.001                         | <.001   | <b>.105</b> |
|                         | E2 | Junior high school    | <.001                         | <.001   | <.001       |
|                         | E3 | Senior high school    | <.001                         | <.001   | <.001       |
|                         | E4 | Junior college        | <.001                         | <.001   | <.001       |
|                         | E5 | University            | <.001                         | <.001   | <.001       |
|                         | E6 | Graduate and above    | <.001                         | <.001   | <b>.339</b> |
| Marital Status          | M1 | Single                | <.001                         | <.001   | <.001       |
|                         | M2 | Married or Cohabiting | <.001                         | <.001   | <.001       |
|                         | M3 | Other*                | <.001                         | <.001   | <b>.100</b> |
| Living Area             | L1 | Northern Area         | <.001                         | <.001   | <.001       |
|                         | L2 | Central Area          | <.001                         | <.001   | <.001       |
|                         | L3 | Southern Area         | <.001                         | <.001   | <.001       |
|                         | L4 | Eastern Area          | <.001                         | <.001   | <b>.657</b> |
|                         | L5 | Taipei City           | <.001                         | <.001   | <.001       |
|                         | L6 | Kaohsiung City        | <.001                         | <.001   | .003        |
| Personal Monthly Income | P1 | Less than US\$450     | <.001                         | <.001   | .001        |
|                         | P2 | US\$451~ US\$650      | <.001                         | <.001   | .004        |
|                         | P3 | US\$651~ US\$950      | <.001                         | <.001   | <.001       |
|                         | P4 | US\$951~ US\$1,250    | <.001                         | <.001   | <.001       |
|                         | P5 | US\$1,251~ US\$1,550  | <.001                         | <.001   | .001        |
|                         | P6 | US\$1,551~ US\$2,250  | <.001                         | <.001   | <.001       |
|                         | P7 | Above US\$2,251       | <.001                         | <.001   | .002        |
|                         | P8 | DK or RA**            | <.001                         | <.001   | <.001       |
| Family Monthly Income   | F1 | No income or Unstable | <.001                         | <.001   | .001        |
|                         | F2 | Less than US\$650     | <.001                         | <.001   | .030        |
|                         | F3 | US\$651~ US\$1,250    | <.001                         | <.001   | <.001       |
|                         | F4 | US\$1,251~ US\$1,850  | <.001                         | <.001   | <.001       |
|                         | F5 | US\$1,851~ US\$2,450  | <.001                         | <.001   | <.001       |
|                         | F6 | US\$2,451~ US\$3,050  | <.001                         | <.001   | .003        |
|                         | F7 | US\$3,051~ US\$4,650  | <.001                         | <.001   | <.001       |
|                         | F8 | Above US\$4,651       | <.001                         | <.001   | .005        |
|                         | F9 | DK or RA**            | <.001                         | <.001   | <.001       |
| Computer Ownership      | C1 | Own                   | <.001                         | <.001   | <.001       |
|                         | C2 | Didn't own            | <.001                         | <.001   | <.001       |
| Internet Access         | I1 | Yes                   | <.001                         | <.001   | <.001       |
|                         | I2 | No                    | <.001                         | <.001   | <.001       |

Data resource: This research

\* Including divorced, separated, widower, or widow

\*\*DK or RA' represents "do not know" or "refuse to answer."

H4, H5, H6 are alternative hypotheses. H4: The adoption rate of a given e-health service is bound to consumers' corresponding awareness rate. H5: The adoption rate of a given e-health service is bound to consumers' corresponding want rate. H6: The want rate for a given e-health service is not necessarily bound to consumers' corresponding awareness rate.

**Table 8. P-values of the paired proportion tests for H4, H5, and H6 in DHCS**

| Demographics            |    |                       | Digital Home Care Service (DHCS) |         |         |
|-------------------------|----|-----------------------|----------------------------------|---------|---------|
|                         |    |                       | H4                               | H5      | H6      |
| Variables               | ID | Items                 | P-value                          | P-value | P-value |
| Total                   | T  |                       | <.001                            | <.001   | <.001   |
| Gender                  | G1 | Male                  | <.001                            | <.001   | <.001   |
|                         | G2 | Female                | <.001                            | <.001   | <.001   |
| Age Level               | A1 | 15–24                 | <.001                            | <.001   | <.001   |
|                         | A2 | 25–34                 | <.001                            | <.001   | <.001   |
|                         | A3 | 35–44                 | <.001                            | <.001   | <.001   |
|                         | A4 | 45–54                 | <.001                            | <.001   | <.001   |
|                         | A5 | 55–64                 | <.001                            | <.001   | <.001   |
|                         | A6 | over 65               | <.001                            | <.001   | <.001   |
| Educational Level       | E1 | Below primary school  | <.001                            | <.001   | <.001   |
|                         | E2 | Junior high school    | <.001                            | <.001   | <.001   |
|                         | E3 | Senior high school    | <.001                            | <.001   | <.001   |
|                         | E4 | Junior college        | <.001                            | <.001   | <.001   |
|                         | E5 | University            | <.001                            | <.001   | <.001   |
|                         | E6 | Graduate and above    | <.001                            | <.001   | .028    |
| Marital Status          | M1 | Single                | <.001                            | <.001   | <.001   |
|                         | M2 | Married or Cohabiting | <.001                            | <.001   | <.001   |
|                         | M3 | Other*                | <.001                            | <.001   | .005    |
| Living Area             | L1 | Northern Area         | <.001                            | <.001   | <.001   |
|                         | L2 | Central Area          | <.001                            | <.001   | <.001   |
|                         | L3 | Southern Area         | <.001                            | <.001   | <.001   |
|                         | L4 | Eastern Area          | <.001                            | <.001   | <.001   |
|                         | L5 | Taipei City           | <.001                            | <.001   | <.001   |
|                         | L6 | Kaohsiung City        | <.001                            | <.001   | <.001   |
| Personal Monthly Income | P1 | Less than US\$450     | <.001                            | <.001   | <.001   |
|                         | P2 | US\$451~ US\$650      | <.001                            | <.001   | .003    |
|                         | P3 | US\$651~ US\$950      | <.001                            | <.001   | <.001   |
|                         | P4 | US\$951~ US\$1,250    | <.001                            | <.001   | <.001   |
|                         | P5 | US\$1,251~ US\$1,550  | <.001                            | <.001   | .003    |
|                         | P6 | US\$1,551~ US\$2,250  | <.001                            | <.001   | <.001   |
|                         | P7 | Above US\$2,251       | <.001                            | <.001   | .015    |
|                         | P8 | DK or RA**            | <.001                            | <.001   | <.001   |
| Family Monthly Income   | F1 | No income or Unstable | <.001                            | <.001   | .001    |
|                         | F2 | Less than US\$650     | <.001                            | <.001   | .004    |
|                         | F3 | US\$651~ US\$1,250    | <.001                            | <.001   | <.001   |
|                         | F4 | US\$1,251~ US\$1,850  | <.001                            | <.001   | <.001   |
|                         | F5 | US\$1,851~ US\$2,450  | <.001                            | <.001   | <.001   |
|                         | F6 | US\$2,451~ US\$3,050  | <.001                            | <.001   | <.001   |
|                         | F7 | US\$3,051~ US\$4,650  | <.001                            | <.001   | <.001   |
|                         | F8 | Above US\$4,651       | <.001                            | <.001   | .001    |
| Computer Ownership      | C1 | Own                   | <.001                            | <.001   | <.001   |
|                         | C2 | Didn't own            | <.001                            | <.001   | .009    |
| Internet Access         | I1 | Yes                   | <.001                            | <.001   | <.001   |
|                         | I2 | No                    | <.001                            | <.001   | <.001   |

Data resource: This research

\* Including divorced, separated, widower, or widow

\*\*DK or RA' represents "do not know" or "refuse to answer."

H4, H5, H6 are alternative hypotheses. H4: The adoption rate of a given e-health service is bound to consumers' corresponding awareness rate. H5: The adoption rate of a given e-health service is bound to consumers' corresponding want rate. H6: The want rate for a given e-health service is not necessarily bound to consumers' corresponding awareness rate.

**Table 9. P-values of the two independent proportion tests for H7, H8, and H9 in DMS**

| Demographics/<br>Computer ownership/<br>Internet access |                       | Digital Medical Service |                |             |                   |                 |             |                    |                 |             |
|---------------------------------------------------------|-----------------------|-------------------------|----------------|-------------|-------------------|-----------------|-------------|--------------------|-----------------|-------------|
|                                                         |                       | H7                      |                |             | H8                |                 |             | H9                 |                 |             |
|                                                         |                       | Want rate (%)           |                | P-value     | Adoption rate (%) |                 | P-value     | Awareness rate (%) |                 | P-value     |
|                                                         |                       | Given<br>unaware        | Given<br>Aware |             | Given<br>Unwanted | Given<br>wanted |             | Given<br>Unwanted  | Given<br>wanted |             |
| Total                                                   |                       | 46.65                   | 82.52          | <.001       | 9.83              | 54.49           | <.001       | 68.22              | 92.05           | <.001       |
| Gender                                                  | Male                  | 51.30                   | 81.55          | <.001       | 10.99             | 51.90           | <.001       | 71.95              | 91.50           | <.001       |
|                                                         | Female                | 42.37                   | 83.47          | <.001       | 8.68              | 57.01           | <.001       | 64.53              | 92.59           | <.001       |
| Age Level                                               | 15–24                 | 60.87                   | 83.09          | <.001       | 8.61              | 44.87           | <.001       | 61.80              | 83.64           | <.001       |
|                                                         | 25–34                 | 61.01                   | 86.05          | .002        | 16.92             | 62.33           | <.001       | 83.17              | 95.12           | .003        |
|                                                         | 35–44                 | 78.48                   | 83.03          | <b>.572</b> | 6.07              | 58.66           | <.001       | 93.65              | 95.19           | <b>.529</b> |
|                                                         | 45–54                 | 65.96                   | 81.80          | .021        | 15.99             | 50.04           | <.001       | 83.22              | 92.00           | .021        |
|                                                         | 55–64                 | 42.83                   | 81.19          | <.001       | 10.65             | 47.72           | <.001       | 69.77              | 93.01           | <.001       |
|                                                         | over 65               | 16.02                   | 76.95          | <.001       | 4.58              | 60.92           | <.001       | 40.28              | 92.19           | <.001       |
|                                                         | Educational<br>Level  | Below primary school    | 22.09          | 75.30       | <.001             | 4.12            | 53.16       | <.001              | 39.04           | 87.32       |
| Junior high school                                      |                       | 44.28                   | 78.11          | <.001       | 3.51              | 40.11           | <.001       | 54.17              | 84.15           | <.001       |
| Senior high school                                      |                       | 57.46                   | 77.96          | <.001       | 9.22              | 47.35           | <.001       | 78.31              | 90.44           | <.001       |
| Junior college                                          |                       | 69.91                   | 86.78          | <b>.096</b> | 16.56             | 57.15           | <.001       | 88.28              | 95.51           | <b>.095</b> |
| University                                              |                       | 65.98                   | 86.46          | .001        | 18.22             | 61.89           | <.001       | 83.26              | 94.24           | .002        |
| Graduate and above                                      |                       | 77.43                   | 95.76          | <b>.500</b> | 20.10             | 68.40           | .008        | 86.87              | 97.75           | <b>.424</b> |
| Marital<br>Status                                       | Single                | 62.24                   | 84.10          | <.001       | 12.22             | 51.16           | <.001       | 72.48              | 89.42           | <.001       |
|                                                         | Married or Cohabiting | 46.86                   | 82.09          | <.001       | 9.54              | 57.55           | <.001       | 74.93              | 93.95           | <.001       |
|                                                         | Other*                | 13.60                   | 71.01          | <.001       | 5.18              | 24.50           | .004        | 23.11              | 82.38           | <.001       |
| Living<br>Area                                          | Northern Area         | 49.65                   | 83.25          | <.001       | 10.73             | 54.22           | <.001       | 73.26              | 93.25           | <.001       |
|                                                         | Central Area          | 57.73                   | 79.20          | <.001       | 9.89              | 50.90           | <.001       | 74.73              | 89.18           | <.001       |
|                                                         | Southern Area         | 46.65                   | 82.94          | <.001       | 9.44              | 56.55           | .002        | 65.62              | 91.39           | <.001       |
|                                                         | Eastern Area          | 76.29                   | 85.90          | <b>.407</b> | 10.41             | 47.58           | .002        | 79.78              | 88.19           | <b>.407</b> |
|                                                         | Taipei City           | 46.03                   | 85.98          | .001        | 15.12             | 60.93           | <.001       | 78.93              | 96.42           | .002        |
|                                                         | Kaohsiung City        | 18.06                   | 81.50          | <.001       | 4.29              | 52.89           | <.001       | 37.17              | 92.20           | <.001       |
| Personal<br>monthly<br>Income                           | Less than US\$450     | 50.81                   | 78.43          | <.001       | 8.19              | 52.75           | <.001       | 63.53              | 85.98           | <.001       |
|                                                         | US\$451~ US\$650      | 47.32                   | 81.10          | .001        | 4.77              | 54.78           | <.001       | 68.27              | 91.13           | .006        |
|                                                         | US\$651~ US\$950      | 64.49                   | 84.32          | .015        | 4.73              | 56.84           | <.001       | 83.35              | 93.68           | .016        |
|                                                         | US\$951~ US\$1,250    | 82.52                   | 85.26          | <b>.736</b> | 14.08             | 56.89           | <.001       | 94.55              | 95.51           | <b>.736</b> |
|                                                         | US\$1,251~ US\$1,550  | 75.12                   | 85.87          | <b>.332</b> | 23.70             | 58.71           | <.001       | 89.30              | 94.38           | <b>.324</b> |
|                                                         | US\$1,551~ US\$2,250  | 56.12                   | 88.42          | <b>.432</b> | 33.80             | 73.38           | <.001       | 94.72              | 99.08           | <b>.341</b> |
|                                                         | Above US\$2,251       | 76.07                   | 88.82          | <b>.487</b> | 27.39             | 46.59           | <b>.135</b> | 95.34              | 98.08           | <b>.487</b> |
|                                                         | DK or RA**            | 30.35                   | 77.11          | <.001       | 6.33              | 43.18           | <.001       | 49.37              | 88.29           | <.001       |
| Family<br>Monthly<br>Income                             | No income or Unstable | 50.55                   | 70.00          | <b>.134</b> | 5.62              | 53.54           | <.001       | 77.39              | 88.65           | <b>.176</b> |
|                                                         | Less than US\$650     | 40.94                   | 75.84          | <.001       | 1.88              | 48.96           | <.001       | 57.72              | 86.07           | .001        |
|                                                         | US\$651~ US\$1,250    | 43.42                   | 78.50          | <.001       | 6.65              | 48.84           | <.001       | 65.37              | 89.98           | <.001       |
|                                                         | US\$1,251~ US\$1,850  | 69.36                   | 83.92          | .022        | 8.52              | 53.84           | <.001       | 81.28              | 90.92           | .022        |
|                                                         | US\$1,851~ US\$2,450  | 61.70                   | 86.95          | .007        | 11.60             | 61.00           | <.001       | 80.97              | 94.62           | .008        |
|                                                         | US\$2,451~ US\$3,050  | 70.45                   | 88.01          | <b>.111</b> | 16.59             | 61.49           | <.001       | 85.47              | 94.77           | <b>.110</b> |
|                                                         | US\$3,051~ US\$4,650  | 77.18                   | 86.41          | <b>.313</b> | 26.60             | 60.53           | <.001       | 91.58              | 95.34           | <b>.414</b> |
|                                                         | Above US\$4,651       | 43.38                   | 89.29          | .042        | 33.81             | 61.10           | .020        | 77.41              | 97.39           | <b>.051</b> |
| DK or RA**                                              | 29.32                 | 76.09                   | <.001          | 7.35        | 43.78             | <.001           | 51.00       | 88.87              | <.001           |             |
| Computer<br>Ownership                                   | Own                   | 58.59                   | 83.64          | <.001       | 12.46             | 54.85           | <.001       | 77.21              | 92.45           | <.001       |
|                                                         | Didn't own            | 16.72                   | 66.01          | <.001       | 0.82              | 48.27           | <.001       | 37.44              | 85.28           | <.001       |
| Internet<br>Access                                      | Yes                   | 62.73                   | 86.38          | <.001       | 14.88             | 58.58           | <.001       | 79.15              | 93.47           | <.001       |
|                                                         | No                    | 32.71                   | 71.71          | <.001       | 4.87              | 41.56           | <.001       | 57.50              | 87.58           | <.001       |

Data resource: This research

\* Including divorced, separated, widower, or widow

\*\*DK or RA' represents "do not know" or "refuse to answer."

H7, H8, H9 are alternative hypotheses. H7: Want rate, given awareness for each consumer segment, is higher than want rate with unawareness. H8: Adoption rate, given want for each consumer segment, is higher than adoption rate without want. H9: Awareness rate, given want for each consumer segment, is higher than awareness rate without want.

**Table 10. P-values of the two independent proportion tests for H7, H8, and H9 in DHCS**

| Demographics/<br>Computer ownership/Internet access |                       | Digital Home Care Service |             |                  |                |              |             |                |              |             |
|-----------------------------------------------------|-----------------------|---------------------------|-------------|------------------|----------------|--------------|-------------|----------------|--------------|-------------|
|                                                     |                       | H7                        |             |                  | H8             |              |             | H9             |              |             |
|                                                     |                       | Want rate                 |             | P-value          | Adoption rate  |              | P-value     | Awareness rate |              | P-value     |
|                                                     |                       | Given unaware             | Given aware |                  | Given Unwanted | Given wanted |             | Given Unwanted | Given wanted |             |
| Total                                               |                       | 64.15                     | 74.86       | <.001            | 1.21           | 6.48         | <.001       | 42.06          | 54.71        | <.001       |
| Gender                                              | Male                  | 62.34                     | 75.86       | <.001            | 1.11           | 7.43         | <.001       | 42.07          | 57.95        | .001        |
|                                                     | Female                | 65.77                     | 73.81       | .001             | 1.32           | 5.55         | <.001       | 42.06          | 51.56        | <.001       |
| Age Level                                           | 15–24                 | 69.67                     | 74.31       | <b>.244</b>      | 1.85           | 7.73         | .001        | 44.93          | 50.69        | <b>.244</b> |
|                                                     | 25–34                 | 65.96                     | 75.50       | .009             | 2.03           | 6.35         | .006        | 42.99          | 54.53        | .009        |
|                                                     | 35–44                 | 69.73                     | 75.87       | <b>.104</b>      | 0.55           | 5.26         | <.001       | 49.84          | 57.56        | <b>.104</b> |
|                                                     | 45–54                 | 76.72                     | 76.35       | <b>.919</b>      | 2.10           | 4.71         | <b>.108</b> | 59.55          | 59.05        | <b>.919</b> |
|                                                     | 55–64                 | 61.39                     | 73.47       | <b>.103</b>      | 1.15           | 5.52         | .013        | 38.09          | 51.73        | .013        |
|                                                     | over 65               | 42.89                     | 71.18       | <.001            | 0.00           | 11.08        | <.001       | 24.40          | 51.49        | <.001       |
| Education Level                                     | Below primary school  | 41.05                     | 73.29       | <.001            | 0.00           | 7.74         | <.001       | 17.13          | 44.88        | <.001       |
|                                                     | Junior high school    | 53.54                     | 71.06       | .004             | 0.58           | 4.64         | .032        | 34.40          | 52.78        | .004        |
|                                                     | Senior high school    | 67.66                     | 72.41       | <b>.100</b>      | 0.97           | 5.83         | <.001       | 47.34          | 52.99        | .099        |
|                                                     | Junior college        | 75.56                     | 76.41       | <b>.841</b>      | 1.77           | 5.41         | .044        | 59.56          | 60.67        | <b>.840</b> |
|                                                     | University            | 72.04                     | 77.70       | <b>.059</b>      | 2.84           | 7.65         | .002        | 47.61          | 55.14        | <b>.058</b> |
|                                                     | Graduate and above    | 78.34                     | 77.12       | <b>.868</b>      | 0.00           | 7.40         | .003        | 67.00          | 65.43        | <b>.868</b> |
| Marital Status                                      | Single                | 67.56                     | 75.99       | .002             | 1.94           | 7.28         | <.001       | 43.29          | 53.71        | .002        |
|                                                     | Married or Cohabiting | 66.66                     | 74.22       | <.001            | 1.00           | 6.08         | <.001       | 46.33          | 55.42        | <.001       |
|                                                     | Other*                | 24.01                     | 75.68       | <.001            | 0.00           | 4.68         | <b>.130</b> | 9.70           | 51.41        | <.001       |
| Living Area                                         | Northern Area         | 69.33                     | 72.15       | <b>.334</b>      | 1.32           | 7.09         | <.001       | 49.12          | 52.53        | <b>.334</b> |
|                                                     | Central Area          | 66.09                     | 75.42       | .005             | 2.23           | 7.31         | .001        | 46.36          | 57.65        | .005        |
|                                                     | Southern Area         | 59.30                     | 74.56       | <.001            | 0.99           | 6.03         | <.001       | 37.31          | 54.49        | <.001       |
|                                                     | Eastern Area          | 80.76                     | 80.41       | <b>.967</b>      | 3.31           | 3.46         | <b>.976</b> | 52.67          | 52.11        | <.001       |
|                                                     | Taipei City           | 67.65                     | 79.93       | .008             | 0.00           | 3.56         | .002        | 40.76          | 56.72        | <b>.957</b> |
|                                                     | Kaohsiung City        | 44.51                     | 74.90       | <.001            | 0.00           | 8.98         | <.001       | 22.73          | 52.25        | .007        |
| Personal monthly Income                             | Less than US\$450     | 57.97                     | 74.10       | <.001            | 0.65           | 7.53         | <.001       | 31.41          | 48.72        | <.001       |
|                                                     | US\$451~ US\$650      | 65.84                     | 71.53       | <b>.377</b>      | 3.36           | 7.48         | <b>.190</b> | 51.03          | 57.59        | <b>.377</b> |
|                                                     | US\$651~ US\$950      | 65.33                     | 77.17       | .003             | 0.39           | 6.50         | <.001       | 41.19          | 55.69        | .003        |
|                                                     | US\$951~ US\$1,250    | 74.81                     | 78.37       | <b>.384</b>      | 2.93           | 6.10         | <b>.140</b> | 48.93          | 53.88        | <b>.384</b> |
|                                                     | US\$1,251~ US\$1,550  | 70.30                     | 76.17       | <b>.291</b>      | 2.21           | 6.34         | .091        | 57.33          | 64.47        | <b>.282</b> |
|                                                     | US\$1,551~ US\$2,250  | 84.91                     | 78.91       | <b>.257</b>      | 3.40           | 6.84         | <b>.412</b> | 69.02          | 59.71        | <b>.260</b> |
|                                                     | Above US\$2,251       | 80.48                     | 79.16       | <b>.865</b>      | 0.00           | 10.98        | <.001       | 68.00          | 66.19        | <b>.856</b> |
|                                                     | DK or RA**            | 54.52                     | 67.85       | .001             | 0.45           | 3.86         | .001        | 35.46          | 49.17        | .001        |
| Family Monthly Income                               | No income or Unstable | 48.34                     | 72.91       | .011             | 0.00           | 1.02         | <b>.507</b> | 24.56          | 48.35        | .012        |
|                                                     | Less than US\$650     | 44.10                     | 76.44       | <.001            | 0.98           | 4.74         | <b>.143</b> | 25.85          | 58.91        | <.001       |
|                                                     | US\$651~ US\$1,250    | 65.97                     | 73.29       | <b>.083</b>      | 1.40           | 6.61         | .002        | 38.15          | 46.62        | .083        |
|                                                     | US\$1,251~ US\$1,850  | 66.86                     | 79.63       | <b>1&lt;.001</b> | 0.00           | 6.29         | <.001       | 44.90          | 61.23        | .001        |
|                                                     | US\$1,851~ US\$2,450  | 71.91                     | 73.88       | <b>.642</b>      | 2.18           | 7.98         | .004        | 53.48          | 55.95        | <b>.642</b> |
|                                                     | US\$2,451~ US\$3,050  | 73.50                     | 76.05       | <b>.603</b>      | 4.14           | 5.94         | <b>.545</b> | 51.63          | 55.00        | <b>.603</b> |
|                                                     | US\$3,051~ US\$4,650  | 80.81                     | 77.39       | <b>.487</b>      | 2.56           | 8.91         | .022        | 65.56          | 60.74        | <b>.487</b> |
|                                                     | Above US\$4,651       | 65.53                     | 78.53       | <b>.077</b>      | 0.00           | 10.94        | <.001       | 44.41          | 60.58        | <b>.072</b> |
|                                                     | DK or RA**            | 54.11                     | 66.52       | 0.003            | 0.50           | 3.74         | .005        | 34.50          | 47.01        | .003        |
| Computer Ownership                                  | Own                   | 69.71                     | 75.31       | 0.001            | 1.39           | 6.56         | <.001       | 47.76          | 54.78        | .001        |
|                                                     | Didn't own            | 26.93                     | 67.58       | <.001            | 0.45           | 5.03         | .033        | 16.91          | 53.50        | <.001       |
| Internet Access                                     | Yes                   | 72.86                     | 76.67       | 0.044            | 2.10           | 7.04         | <.001       | 51.59          | 56.59        | .044        |
|                                                     | No                    | 48.86                     | 69.08       | <.001            | 0.00           | 4.74         | <.001       | 29.06          | 48.93        | <.001       |

Data resource: This research

\* Including divorced, separated, widower, or widow

\*\*DK or RA' represents "do not know" or "refuse to answer."

H7, H8, H9 are alternative hypotheses. H7: Want rate, given awareness for each consumer segment, is higher than want rate with unawareness. H8: Adoption rate, given want for each consumer segment, is higher than adoption rate without want. H9: Awareness rate, given want for each consumer segment, is higher than awareness rate without want.
