# Supplementary material for: Matrix Analysis of the Digital Divide in eHealth Services Using Awareness, Want, and Adoption Gap
Source: J Med Internet Res. 2012 Feb 13;14(1):e11. doi: 10.2196/jmir.1670 (PMC3374548; doi:10.2196/jmir.1670)
Supplement: Supplementary file 1 [file jmir_v14i1e11_app1.pdf]

## Multimedia Appendix 1: the survey methodology and questionnaire

---

### 1. Survey Methodology

|                 |                                                                                                                                                                                                                                          |
|-----------------|------------------------------------------------------------------------------------------------------------------------------------------------------------------------------------------------------------------------------------------|
| Survey Method   | Computer Assisted Telephone Interviewing Survey                                                                                                                                                                                          |
| Sample Number   | 3,074 valid samples                                                                                                                                                                                                                      |
| Target          | Residents in Taiwan aged 15 and above                                                                                                                                                                                                    |
| Population      | 20,373,096 residents in 20 cities/counties in Taiwan.                                                                                                                                                                                    |
| Sampling Method | A stratified simple random sampling was used by separating the population elements into strata composed of the 23 cities/counties in Taiwan. The sample size of each stratum was determined by using the proportional allocation method. |

## 2.Questionnaire

### The Usage Survey on Digital Medical Services

Good day, this is the Survey and Statistics Analysis Research and Consult Center of Fu Jen Catholic University. We are making a telephone survey on the usage regarding digital medical services. I would like to ask you some questions. Please join me for just a few minutes. Thank you!

● **Are you a citizen of R.O.C.?**

☐1. Y

☐2. N (End the interview.)

● **Are you 15 years old or older?**

☐1. Y

☐2. N (End the interview.)

● **Does this telephone number belong to a household or household-business mixed?**

☐1. Y

☐2. N (End the interview.)

● **Your telephone was automatically selected by a computer. Can you please tell me the county or city this telephone number belongs to?**

☐1. Northern Area

☐2. Central Area

☐3. Southern Area

☐4. Eastern Area

☐5. Taipei City

☐6. Kaohiung City

☐7. Refused to answer (End the interview.)

**1. Have you ever heard of services or contents regarding ‘Digital medical service (DMS)’? (For example: on-line reservation, electronic medical records, on-line inquiry for medical treatment, on-line drug information, and so on)**

☐1. Y

☐2. N (Do not need to interview question 3)

**2. Are you in want of ‘Digital Medical Service (DMS)’?**

☐1. Y

☐2. N

**3. Have you ever used ‘Digital Medical Service (DMS)’?**

☐1. Y

☐2. N

**4. Have you ever heard of services or contents regarding ‘Digital home care service (DHCS)’? (For example: long-term management of physiological conditions, voice drug reminder, abnormal records, and active care and contact)**

☐1. Y

☐2. N (Do not need to interview question 6)

**5. Are you in want of ‘Digital home care service (DHCS)’?**

☐1. Y

☐2. N

**6. Have you ever used 'Digital home care service (DHCS)'?**

- ☐1. Y ☐2. N

**7. Do you have a computer at home?**

- ☐1. Y ☐2. N  
☐3. Do not know or refused to answer

**8. Have you ever used the Internet?**

- ☐1. Y ☐2. N (Do not need to interview question 9)  
☐3. Do not know or refused to answer (Do not need to interview question 9)

**9. What method do you use to connect to the Internet? (Multiple choices)**

- ☐1. Broadband (includes dial-up) ☐2. Wireless ☐3. Mobile

**10. What is your highest educational attainment?**

- ☐1. Primary and below ☐2. Junior middle school  
☐3. Senior and professional high school ☐4. Junior college  
☐5. Undergraduate college ☐6. Postgraduate and above

**11. What is your age? (Check the appropriate box.)**

- ☐1. 15–24 y ☐2. 25–34 y ☐3. 35–44 y  
☐4. 45–54 y ☐5. 55–64 y ☐6. 65 y and above

**12. What is your current marital status?**

- ☐1. Single ☐2. Married or cohabitating  
☐3. Other (includes divorced or separated, widow or widower)  
☐4. Do not know or refused to answer

**13. How many children do you have?**

- ☐1. Non ☐2. Have children (How many?\_\_\_\_\_)  
☐3. Do not know or refused to answer

**14. What is your personal monthly income?**

- ☐1. Less than US\$450 ☐2. US\$451~ US\$650  
☐3. US\$651~ US\$950 ☐4. US\$951~ US\$1,250  
☐5. US\$1,251~ US\$1,550 ☐6. US\$1,551~ US\$2,250  
☐7. Above US\$2,251 ☐8. Do not know or refused to answer

**15. What is your average monthly family income?**

- ☐1. No income or Unstable ☐2. Less than US\$650  
☐3. US\$651~ US\$1,250 ☐4. US\$1,251~ US\$1,850  
☐5. US\$1,851~ US\$2,450 ☐6. US\$2,451~ US\$3,050  
☐7. US\$3,051~ US\$4,650 ☐8. Above US\$4,651  
☐9. Do not know or refused to answer

**16. What is the gender of the interviewee?**

- ☐1. Male ☐2. Female
